# Supplementary material
Source: Research Square preprint supplement (doi:10.21203/rs.3.rs-8671307/v1)
Supplement: Supplementary file 1 [file 8079940c78933219b43eda50.xlsx]

## Sheet: Descriptive Statistics
Descriptive Statistics of Sustainability Consciousness (N=112)
Dimension	Mean	SD	Min	Max	Range	% of Max
Knowingness	28.4464	3.6089	23	36	13	71.1161
Attitude	20.7143	3.97385	15	29	14	51.7857
Behavior	16.7143	3.97385	11	25	14	41.7857
Total ESC	65.875	11.551	49	90	41	54.8958
Note: ESC = Ethno-Sustainability Consciousness. % of Max shows performance relative to maximum possible score.
