# Supplementary material
Source: Research Square preprint supplement (doi:10.21203/rs.3.rs-8671307/v1)
Supplement: Supplementary file 2 [file 819c21bed0bb95d34f8c4b9d.xlsx]

## Sheet: Categorical Distribution
Categorical Distribution of Sustainability Consciousness (N=112)
Category	Score Range	Frequency (n)	Percentage (%)	Description
Low	49-60	34	30.3571	Basic sustainability consciousness
Moderate	61-79	59	52.6786	Developing sustainability consciousness
High	80-90	19	16.9643	Advanced sustainability consciousness
Total		112	100
