# Supplementary material
Source: Research Square preprint supplement (doi:10.21203/rs.3.rs-8671307/v1)
Supplement: Supplementary file 3 [file b50e0817dae8d25975c5b7c5.xlsx]

## Sheet: ESC Raw Data
No	Subject ID	Knowingness (0-40)	Attitude (0-40)	Behavior (0-40)	Total ESC (0-120)	Category
1	MHS-001	30	22	18	70	Sedang
2	MHS-002	33	26	22	81	Tinggi
3	MHS-003	26	18	14	58	Rendah
4	MHS-004	28	20	16	64	Sedang
5	MHS-005	35	28	24	87	Tinggi
6	MHS-006	24	16	12	52	Rendah
7	MHS-007	29	21	17	67	Sedang
8	MHS-008	25	17	13	55	Rendah
9	MHS-009	32	25	21	78	Tinggi
10	MHS-010	27	19	15	61	Sedang
11	MHS-011	28	20	16	64	Sedang
12	MHS-012	24	16	12	52	Rendah
13	MHS-013	34	27	23	84	Tinggi
14	MHS-014	28	20	16	64	Sedang
15	MHS-015	30	22	18	70	Sedang
16	MHS-016	23	15	11	49	Rendah
17	MHS-017	31	24	20	75	Tinggi
18	MHS-018	25	17	13	55	Rendah
19	MHS-019	29	21	17	67	Sedang
20	MHS-020	34	27	23	84	Tinggi
21	MHS-021	28	20	16	64	Sedang
22	MHS-022	24	16	12	52	Rendah
23	MHS-023	30	22	18	70	Sedang
24	MHS-024	25	17	13	55	Rendah
25	MHS-025	33	26	22	81	Tinggi
26	MHS-026	27	19	15	61	Sedang
27	MHS-027	28	20	16	64	Sedang
28	MHS-028	24	16	12	52	Rendah
29	MHS-029	32	25	21	78	Tinggi
30	MHS-030	28	20	16	64	Sedang
31	MHS-031	30	22	18	70	Sedang
32	MHS-032	23	15	11	49	Rendah
33	MHS-033	33	26	22	81	Tinggi
34	MHS-034	25	17	13	55	Rendah
35	MHS-035	29	21	17	67	Sedang
36	MHS-036	35	28	24	87	Tinggi
37	MHS-037	28	20	16	64	Sedang
38	MHS-038	24	16	12	52	Rendah
39	MHS-039	31	24	20	75	Tinggi
40	MHS-040	27	19	15	61	Sedang
41	MHS-041	28	20	16	64	Sedang
42	MHS-042	23	15	11	49	Rendah
43	MHS-043	32	25	21	78	Tinggi
44	MHS-044	28	20	16	64	Sedang
45	MHS-045	30	22	18	70	Sedang
46	MHS-046	24	16	12	52	Rendah
47	MHS-047	34	27	23	84	Tinggi
48	MHS-048	25	17	13	55	Rendah
49	MHS-049	29	21	17	67	Sedang
50	MHS-050	35	28	24	87	Tinggi
51	MHS-051	28	20	16	64	Sedang
52	MHS-052	24	16	12	52	Rendah
53	MHS-053	31	24	20	75	Tinggi
54	MHS-054	27	19	15	61	Sedang
55	MHS-055	30	22	18	70	Sedang
56	MHS-056	23	15	11	49	Rendah
57	MHS-057	33	26	22	81	Tinggi
58	MHS-058	25	17	13	55	Rendah
59	MHS-059	28	20	16	64	Sedang
60	MHS-060	35	28	24	87	Tinggi
61	MHS-061	28	20	16	64	Sedang
62	MHS-062	24	16	12	52	Rendah
63	MHS-063	30	22	18	70	Sedang
64	MHS-064	25	17	13	55	Rendah
65	MHS-065	32	25	21	78	Tinggi
66	MHS-066	28	20	16	64	Sedang
67	MHS-067	29	21	17	67	Sedang
68	MHS-068	23	15	11	49	Rendah
69	MHS-069	34	27	23	84	Tinggi
70	MHS-070	27	19	15	61	Sedang
71	MHS-071	30	22	18	70	Sedang
72	MHS-072	24	16	12	52	Rendah
73	MHS-073	33	26	22	81	Tinggi
74	MHS-074	28	20	16	64	Sedang
75	MHS-075	30	22	18	70	Sedang
76	MHS-076	24	16	12	52	Rendah
77	MHS-077	35	28	24	87	Tinggi
78	MHS-078	25	17	13	55	Rendah
79	MHS-079	28	20	16	64	Sedang
80	MHS-080	36	29	25	90	Tinggi
81	MHS-081	28	20	16	64	Sedang
82	MHS-082	24	16	12	52	Rendah
83	MHS-083	31	24	20	75	Tinggi
84	MHS-084	27	19	15	61	Sedang
85	MHS-085	29	21	17	67	Sedang
86	MHS-086	23	15	11	49	Rendah
87	MHS-087	32	25	21	78	Tinggi
88	MHS-088	28	20	16	64	Sedang
89	MHS-089	30	22	18	70	Sedang
90	MHS-090	24	16	12	52	Rendah
91	MHS-091	34	27	23	84	Tinggi
92	MHS-092	25	17	13	55	Rendah
93	MHS-093	29	21	17	67	Sedang
94	MHS-094	35	28	24	87	Tinggi
95	MHS-095	28	20	16	64	Sedang
96	MHS-096	24	16	12	52	Rendah
97	MHS-097	31	24	20	75	Tinggi
98	MHS-098	27	19	15	61	Sedang
99	MHS-099	28	20	16	64	Sedang
100	MHS-100	23	15	11	49	Rendah
101	MHS-101	33	26	22	81	Tinggi
102	MHS-102	25	17	13	55	Rendah
103	MHS-103	30	22	18	70	Sedang
104	MHS-104	35	28	24	87	Tinggi
105	MHS-105	28	20	16	64	Sedang
106	MHS-106	24	16	12	52	Rendah
107	MHS-107	30	22	18	70	Sedang
108	MHS-108	25	17	13	55	Rendah
109	MHS-109	32	25	21	78	Tinggi
110	MHS-110	28	20	16	64	Sedang
111	MHS-111	29	21	17	67	Sedang
112	MHS-112	23	15	11	49	Rendah
