# Supplementary material
Source: Research Square preprint supplement (doi:10.21203/rs.3.rs-8671307/v1)
Supplement: Supplementary file 4 [file e0f09744d7d647bbd5bd59ca.xlsx]

## Sheet: Psychometric Properties
Psychometric Properties of Sustainability Consciousness Instrument (N=112)
RELIABILITY ANALYSES
Dimension	Cronbach's α	Test-Retest r	Mean Inter-Item r	Interpretation
Knowingness	0.85	0.82	0.43	Good reliability
Attitude	0.82	0.79	0.39	Good reliability
Behavior	0.8	0.77	0.36	Adequate reliability
Total Scale	0.89	0.84	0.41	Excellent reliability
CONSTRUCT VALIDITY - CFA MODEL FIT
Fit Index	Value	Cutoff Criterion	Interpretation
CFI	0.93	≥ 0.90	Good fit
TLI	0.91	≥ 0.90	Good fit
RMSEA	0.062	≤ 0.08	Acceptable fit
SRMR	0.054	≤ 0.08	Good fit
Note: All test-retest correlations significant at p < 0.001 (n=40, 2-week interval)
